# Supplementary material
Source: PubMed Central journal article supplement (PMC4107189)
Supplement: NIHMS600079-supplement-Supp_FigureS1-S2___TableS1.pdf [file NIHMS600079-supplement-Supp_FigureS1-S2___TableS1.pdf]

**Table S1. Oligonucleotides used in this study**

| <b>Oligonucleotide</b> | <b>Sequence<sup>a</sup></b>                                       | <b>Reference</b>                     |
|------------------------|-------------------------------------------------------------------|--------------------------------------|
| 536-Nco-for            | 5' - AGA <u>CCA TGG</u> TTG AGA ATA ATG CGC TGA G                 | (Aoki <i>et al.</i> , 2010)          |
| 536-Xho-rev            | 5' - GAT <u>CTC GAG</u> TAC AAT TAT CTG ATT GAT TTT T             | (Aoki <i>et al.</i> , 2010)          |
| DUF-536-Nco-for        | 5' - TCT <u>CCA TGG</u> GCG TAG ATC CGT CGA AAC TGA C             | This study                           |
| VENN-less-Nco-for      | 5' - AAT <u>GCC ATG</u> GGT CTG GTT GCC AGA GG                    | This study                           |
| tRNase-Nco-for         | 5' - ATA <u>CCA TGG</u> GTT CCG GGG CTG CCT C                     | This study                           |
| 536-Cys(mut)           | 5' - CTT TAG TCC TGC TAG GTG CTG CGA CCG CAC<br>TGC CTC TGG CAA C | This study                           |
| pET-Sph/Pst            | 5' - CAA GGA ATG <u>GTG</u> CAT <u>GCC TGC</u> AGA TGG CGC<br>CC  | (Garza-Sánchez <i>et al.</i> , 2006) |
| pET-Kpn/Nco            | 5' - AGT CCA TGG TAC CTC TCC TTC TTA AAG                          | This study                           |
| 536-H178A-for          | 5' - GGA GGA TAT TGG GAT GCT ATG CAG GAA ATG C                    | (Diner <i>et al.</i> , 2012)         |
| 536-CT-Xho-rev         | 5' - TTA <u>CTC GAG</u> GTA ATC ATA TTC CAT A                     | This study                           |
| 536-cdil-Eco-for       | 5' - AGG <u>GAA TTC</u> CAT ATG ATT ACC TTA CGT AAA               | This study                           |
| 536-cdil-Spe-rev       | 5' - GTG ACT AGT TAC AAT TAT CTG ATT GAT TT                       | This study                           |
| colE5-M429-Nco         | 5' - CTG CCA TGG AAA GCA GGA AGA AG                               | This study                           |
| imE5-Spe               | 5' - AAA ACT AGT CAT CTT TAA CGT GAT AAT GAA<br>AGC               | This study                           |
| immE5-Eco-for          | 5' - GGA <u>GAA TTC</u> TCT ATG AAG TTA TCA CC                    | This study                           |
| pET-Pst-rev            | 5' - CGG <u>CTG CAG</u> CAG CCA ACT CAG TGG                       | This study                           |

|                  |                                                                                                                   |                              |
|------------------|-------------------------------------------------------------------------------------------------------------------|------------------------------|
| colE5-Nco-for    | 5' - GAG TTT <u>CCA TGG</u> GCG GTG GCG ATG G                                                                     | This study                   |
| colE5-Bam-rev    | 5' - AGC <u>GGA TCC</u> TTT ATT ATC CTC TTT CTT CTT C                                                             | This study                   |
| colE5-Bam-for    | 5' - AAA <u>GGA TCC</u> AGA GAT GCT GAA GGC AAA C                                                                 | This study                   |
| immE5-Xho-rev    | 5' - CAC <u>CTC GAG</u> CAT CTT TAA CGT GAT AAT G                                                                 | This study                   |
| 536-Bam-rev      | 5' - GCC <u>CCG GAT CCG</u> TAC TTA TC                                                                            | This study                   |
| traA-Nco-for     | 5' - TAA <u>CCC ATG</u> GTT GCT GTT TTA AGT GTT CAG G                                                             | This study                   |
| traA-Spe-rev     | 5' - TTT ATA <u>CTA GTT</u> CAG AGG CCA ACG ACG GCC<br>ATA CC                                                     | This study                   |
| traA-D74G        | 5' - TTC GGT AAG GGC TCC AGT GTT GTT AAA TGG G                                                                    | This study                   |
| traA-G120C-Spe   | 5' - TAT <u>ACT AGT</u> TCA GAG GCA AAC GAC GGC C                                                                 | This study                   |
| ECL-CT-Kpn-for   | 5' - GGG <u>GGT ACC</u> ATG GCT GAG AAT AAC TCG CTG<br>GC                                                         | This study                   |
| ECL-cdil-Nhe-rev | 5' - CTC <u>TGC TAG</u> CGT TGT TAA GAC TAT GAT AAA<br>AAT C                                                      | This study                   |
| ECL-cdil-Eco-for | 5' - GAT TAA <u>GGA ATT</u> CTG GTA TGT TTG G                                                                     | This study                   |
| ECL-cdil-Sac-rev | 5' - AGT <u>GAG CTC</u> TGT TTC AGT TGT TAA GAC                                                                   | This study                   |
| argQ probe       | 5' - CCT CCG ACC GCT CGG TTC G                                                                                    | (Garza-Sánchez et al., 2006) |
| tyrU probe       | 5' - CTT CGA AGT CTG TGA CGG CAG                                                                                  | (Nikolakakis et al., 2012)   |
| traA-cat-for     | 5' - ACA TTT AAT ACA CTC TAG TTT TAT TCA TTT ATC<br>CGA AAT TGA GGT AAC TTA TGG AGA AAA AAA TCA<br>CTG GAT ATA CC | This study                   |
| traA-cat-rev     | 5' - GGA AAC GAT ATT TCT TAA GTT TAT TCT CGT CTC<br>CCG ACA TCG TTT TAT TTC CTG TTA CGC CCC GCC<br>CTG CCA CTC    | This study                   |

|                                                                                |                                                                                                                   |            |
|--------------------------------------------------------------------------------|-------------------------------------------------------------------------------------------------------------------|------------|
| traT-cat-for                                                                   | 5' - AAA ACA AGA AGT TAT CAA GAG TAA AAT AAA<br>AGA TAT TAG AGA GTA AAT ATA TGG AGA AAA AAA<br>TCA CTG GAT ATA CC | This study |
| traT-cat-rev                                                                   | 5' - CAA AGC GAG GCG TCA GTC AGG AGG CCG GTC<br>AGA CCA GCC TCC GGA AGA TAA TTA CGC CCC GCC<br>CTG CCA CTC        | This study |
| trbl-cat-for1                                                                  | 5' - GGA AGA ACA TGA GAA ATA CAG GAG TGT GGC<br>ATG AGT GAG AAA AAA ATC ACT GGA TAT ACC                           | This study |
| trbl-cat-for2                                                                  | 5' - AAG AAG TCA GGG CCG GAA ATG GCT TCG CTG<br>GAA GCC TGG CTG GAA GAA CAT GAG AAA TAC                           | This study |
| trbl-cat-rev1                                                                  | 5' - GCC CCC ATA TCA GCA GGG CAA TCA GCC CCC<br>GGC ATC TCA TGC CCC TCC CTG CCA CTC ATC                           | This study |
| trbl-cat-rev2                                                                  | 5' - CAC AGA TCG CCC CAG GTA CCA AGA TCG GCG<br>GCG GCC ACA CTC TGC CCC CAT ATC AGC AGG                           | This study |
| trbl-Kpn-for                                                                   | 5' - TTT <u>GGT ACC</u> ATG AGT TCA ACG CAG AAC                                                                   | This study |
| trbl-Xho-rev                                                                   | 5' - TTT <u>CTC GAG</u> TCT CAT GGT TCC GCC CTC                                                                   | This study |
| <sup>a</sup> Underlined residues correspond to restriction endonuclease sites. |                                                                                                                   |            |

## References

- Aoki, S. K., E. J. Diner, C. T. de Roodenbeke, B. R. Burgess, S. J. Poole, B. A. Braaten, A. M. Jones, J. S. Webb, C. S. Hayes, P. A. Cotter & D. A. Low, (2010) A widespread family of polymorphic contact-dependent toxin delivery systems in bacteria. *Nature* 468: 439-442.
- Diner, E. J., C. M. Beck, J. S. Webb, D. A. Low & C. S. Hayes, (2012) Identification of a target cell permissive factor required for contact-dependent growth inhibition (CDI). *Genes Dev* 26: 515-525.
- Garza-Sánchez, F., B. D. Janssen & C. S. Hayes, (2006) Prolyl-tRNA(Pro) in the A-site of SecM-arrested ribosomes inhibits the recruitment of transfer-messenger RNA. *J Biol Chem* 281: 34258-34268.
- Nikolakakis, K., S. Amber, J. S. Wilbur, E. J. Diner, S. K. Aoki, S. J. Poole, A. Tuanyok, P. S. Keim, S. Peacock, C. S. Hayes & D. A. Low, (2012) The toxin/immunity network of *Burkholderia pseudomallei* contact-dependent growth inhibition (CDI) systems. *Mol Microbiol* 84: 516-529.

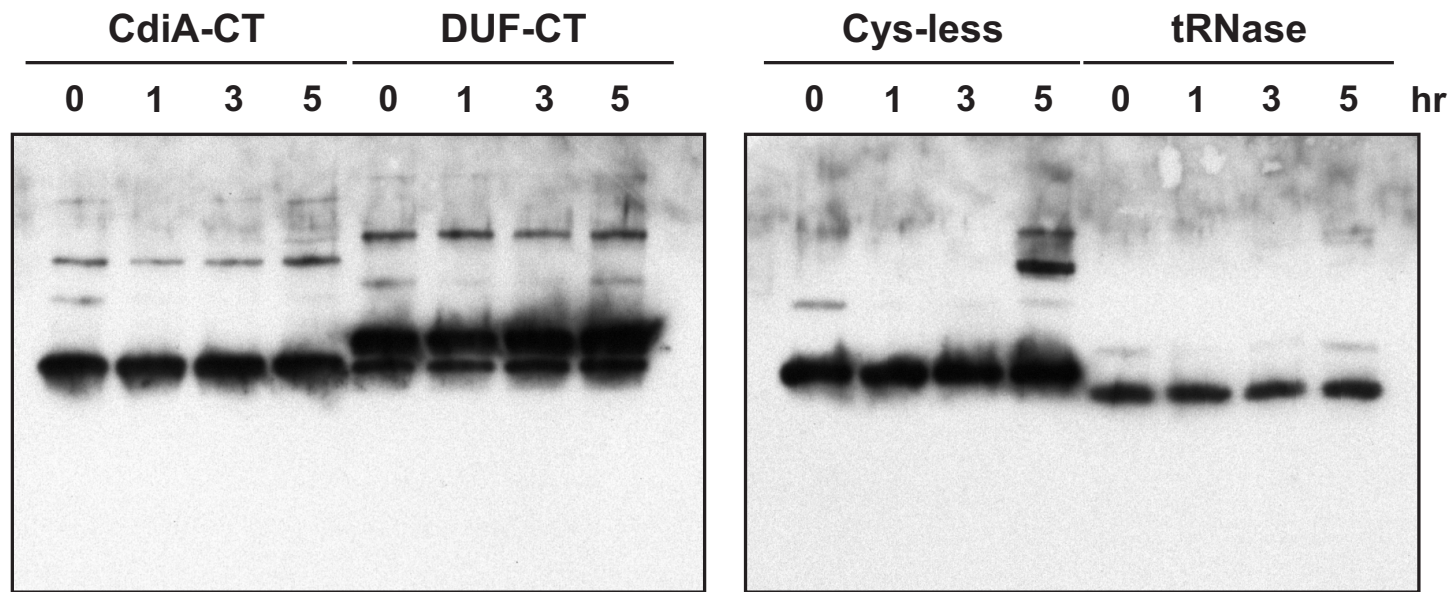

**Figure S1. CdiA-CT<sup>536</sup> toxins are stable in *E. coli* cultures.** Purified CdiA-CT<sup>536</sup> toxins were added at 100 nM to *E. coli* X90 cultures and incubated with shaking at 37 °C. Samples were removed at the indicated times and the culture supernatant analyzed by immunoblot using polyclonal antibodies to CdiA-CT<sup>536</sup>.

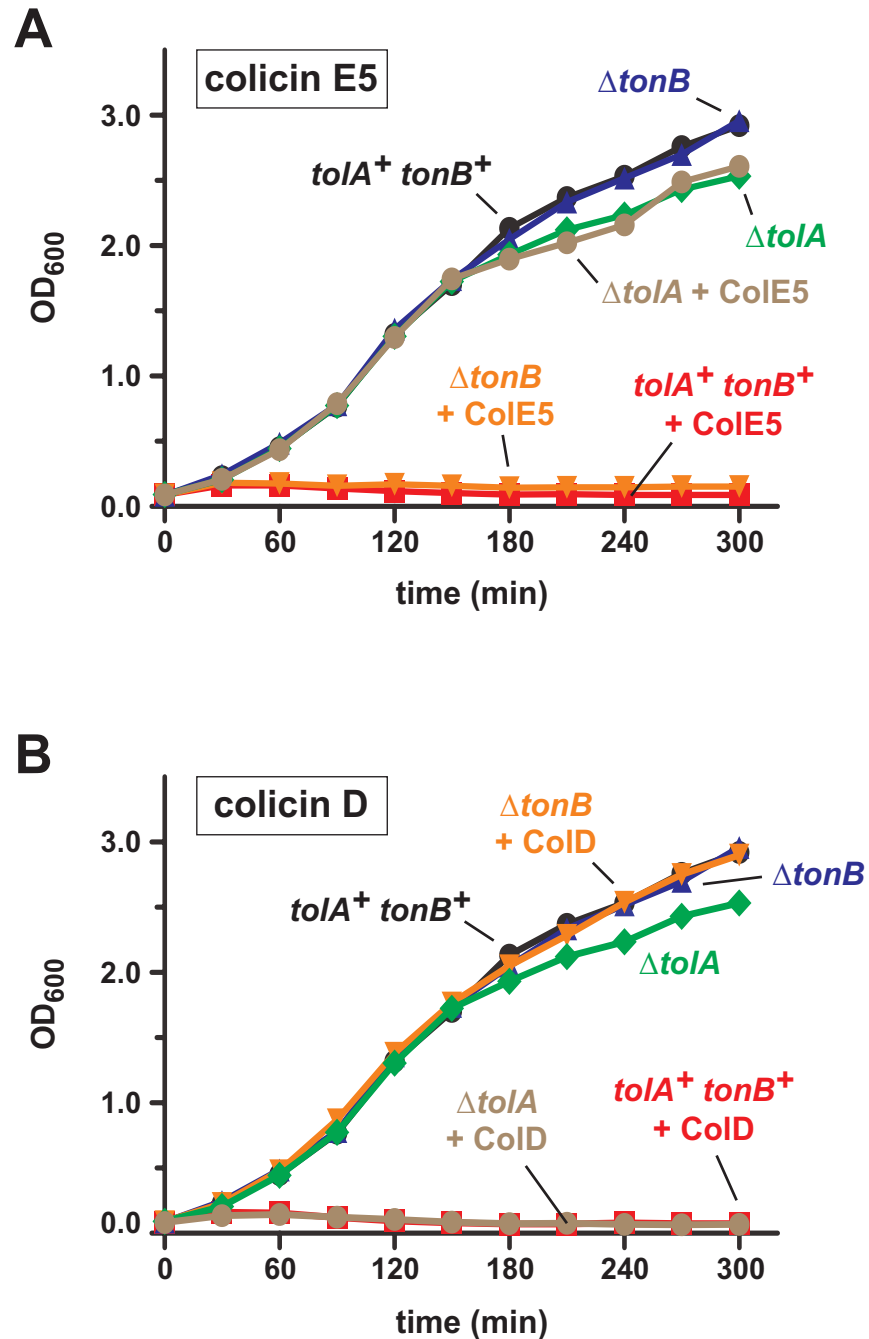

**Figure S2. *E. coli*  $\Delta$ *tolA* and  $\Delta$ *tonB* mutants are resistant to colicin E5 and D, respectively.** **A)** *E. coli* X90 was treated with colicin E5 (ColE5, group A) at 0 min and cell growth monitored by optical density at 600 nm (OD<sub>600</sub>). **B)** *E. coli* X90 was treated at 0 min with colicin D (ColD, group B) and cell growth monitored by OD<sub>600</sub>. Strains carried  $\Delta$ *tolA* or  $\Delta$ *tonB* deletions where indicated.
